# Supplementary material for: Is Canada really an education superpower? The impact of non-participation on results from PISA 2015
Source: Springer Nature journal article supplement (doi:10.1007/s11092-020-09329-5), 2020-07-25
Supplement: MOESM4 [file 18216202]

## PISA 2009 bias analysis – England

5<sup>th</sup> March 2010

In this report we present the results of investigations of possible bias at school level in the PISA 2009 sample in England. In the first section the participating main sample schools are compared with the non-participating main sample schools. In the second section all participating schools (main and replacement) are compared with the original main sample schools.

The aim of this investigation was to identify any differences which existed at the 5% level of significance and to consider the implications of any which were found for possible sample bias.

### ***1 Comparison of main sample participants with main sample non-participants***

As a first stage, we compared the 131 participating main sample schools with the 59 non-participating main sample schools, first using chi-squared analysis to compare according to the stratification variables. This is reported in Table 1.1 below. We then carried out a logistic regression which again included the stratification variables along with additional variables which are generally considered to be possible indications of differences in the attainment of pupils in schools. The results of this are reported in Table 1.5.

#### **1.1 Chi-squared analysis**

Participating and non-participating main sample schools were first compared using the stratification variables, ie:

- School type
- Region
- School attainment band
- Gender

Tables 1.1 – 1.4 show these comparisons. There were no significant differences found on any of these analyses.

**Table 1.1: School type**

|                          |   | <b>main sample non-<br/>participants</b> | <b>main sample<br/>participants</b> | <b>total</b> |
|--------------------------|---|------------------------------------------|-------------------------------------|--------------|
| Independent              | n | 5                                        | 8                                   | 13           |
|                          | % | 8.5%                                     | 6.1%                                | 6.8%         |
| Maintained non-selective | n | 52                                       | 116                                 | 168          |
|                          | % | 88.1%                                    | 88.5%                               | 88.4%        |
| Maintained selective     | n | 2                                        | 7                                   | 9            |
|                          | % | 3.4%                                     | 5.3%                                | 4.7%         |
| Total                    |   | 59                                       | 131                                 | 190          |
|                          |   | <b>Value</b>                             | <b>df</b>                           | <b>sig</b>   |
| Pearson Chi-Square       |   | 0.662                                    | 2                                   | 0.718        |

**Table 1.2: Region**

|                    |   | <b>main sample non-<br/>participants</b> | <b>main sample<br/>participants</b> | <b>total</b> |
|--------------------|---|------------------------------------------|-------------------------------------|--------------|
| Greater London     | n | 5                                        | 19                                  | 24           |
|                    | % | 8.5%                                     | 14.5%                               | 12.6%        |
| Midlands           | n | 22                                       | 39                                  | 61           |
|                    | % | 37.3%                                    | 29.8%                               | 32.1%        |
| North              | n | 20                                       | 37                                  | 57           |
|                    | % | 33.9%                                    | 28.2%                               | 30.0%        |
| South              | n | 12                                       | 36                                  | 48           |
|                    | % | 20.3%                                    | 27.5%                               | 25.3%        |
| Total              |   | 59                                       | 131                                 | 190          |
|                    |   | <b>Value</b>                             | <b>df</b>                           | <b>sig</b>   |
| Pearson Chi-Square |   | 3.141                                    | 3                                   | 0.370        |

**Table 1.3: School attainment (GCSE band)**

|                    |   | main sample non-<br>participants | main sample<br>participants | total      |
|--------------------|---|----------------------------------|-----------------------------|------------|
| Lowest band        | n | 11                               | 23                          | 34         |
|                    | % | 18.6%                            | 17.6%                       | 17.9%      |
| 2nd lowest band    | n | 12                               | 26                          | 38         |
|                    | % | 20.3%                            | 19.8%                       | 20.0%      |
| Middle band        | n | 12                               | 27                          | 39         |
|                    | % | 20.3%                            | 20.6%                       | 20.5%      |
| 2nd highest band   | n | 12                               | 27                          | 39         |
|                    | % | 20.3%                            | 20.6%                       | 20.5%      |
| Highest band       | n | 12                               | 28                          | 40         |
|                    | % | 20.3%                            | 21.4%                       | 21.1%      |
| Total              |   | 59                               | 131                         | 190        |
|                    |   | <b>Value</b>                     | <b>df</b>                   | <b>sig</b> |
| Pearson Chi-Square |   | 0.055                            | 4                           | 1.000      |

**Table 1.4: Gender**

|                    |   | main sample non-<br>participants | main sample<br>participants | total      |
|--------------------|---|----------------------------------|-----------------------------|------------|
| Boys               | n | 2                                | 6                           | 8          |
|                    | % | 3.4%                             | 4.6%                        | 4.2%       |
| Girls              | n | 8                                | 9                           | 17         |
|                    | % | 13.6%                            | 6.9%                        | 8.9%       |
| Mixed              | n | 49                               | 116                         | 165        |
|                    | % | 83.1%                            | 88.5%                       | 86.8%      |
| Total              |   | 59                               | 131                         | 190        |
|                    |   | <b>Value</b>                     | <b>df</b>                   | <b>sig</b> |
| Pearson Chi-Square |   | 2.313                            | 2                           | 0.315      |

## 1.2 Logistic regression

The second stage of comparing participating and non-participating main sample schools was to conduct a logistic regression analysis. Included in this were the stratification variables plus additional variables which are generally considered to be connected with school attainment. These additional variables were:

- Number of full-time equivalent teachers in the school
- Pupil-teacher ratio
- Percentage of pupils eligible for free school meals (considered an indication of socio-economic status)
- Percentage of pupils with English as an additional language
- Average points score for General Certificate of Secondary Education
- Rural/urban school

The results of this analysis are shown in Table 1.5. The only differences that were found to be significant at the 5% level were small effects indicating that boys' schools and schools with high pupil-teacher ratios in the main sample were slightly less likely to respond than other similar schools.

**Table 1.5 Results of logistic regression**

|                                          | <b>B</b> | <b>S.E.</b> | <b>df</b> | <b>Sig.</b> |
|------------------------------------------|----------|-------------|-----------|-------------|
| Full time equivalent teachers            | -0.008   | 0.009       | 1         | 0.370       |
| Pupil-teacher ratio                      | -0.161   | 0.080       | 1         | 0.045       |
| % free school meals                      | -0.022   | 0.024       | 1         | 0.343       |
| % with special educational needs         | 0.177    | 0.159       | 1         | 0.264       |
| % with English as an additional language | 0.024    | 0.017       | 1         | 0.150       |
| average GCSE total points score          | 0.019    | 0.010       | 1         | 0.065       |
| Non-selective school                     | 0.930    | 1.262       | 1         | 0.461       |
| Selective school                         | 0.446    | 1.110       | 1         | 0.688       |
| Greater London                           | 0.677    | 0.714       | 1         | 0.343       |
| North                                    | 0.194    | 0.448       | 1         | 0.664       |
| South                                    | 0.790    | 0.464       | 1         | 0.089       |
| Girl's school                            | -0.359   | 0.982       | 1         | 0.715       |
| Boy's school                             | -1.587   | 0.732       | 1         | 0.030       |
| Rural                                    | 1.283    | 1.344       | 1         | 0.340       |
| School attainment - Lowest band          | 2.682    | 1.840       | 1         | 0.145       |
| School attainment - 2nd Lowest band      | 2.157    | 1.375       | 1         | 0.117       |
| School attainment - Middle band          | 1.335    | 1.076       | 1         | 0.215       |
| School attainment - 2nd Highest band     | 0.774    | 0.837       | 1         | 0.355       |
| Constant                                 | -4.950   | 4.914       | 1         | 0.314       |

## 2 Comparison of main sample with all participating schools

The second stage of the bias analysis was to compare the 165 participating main sample and replacement schools with the original 190 schools in the main sample.

Again we first used chi-squared analysis to compare according to the stratification variables, and then used logistic regression with the inclusion of additional variables which are generally considered to be possible indications of differences in the attainment of pupils in schools. Since schools can be included in both the sample of respondents and the main sample the significance tests are not precise but are intended to give an indication of the severity of any differences.

### 2.1 Chi-squared analysis

They were first compared using the sampling variables, ie:

- School type
- Region
- School attainment band
- Gender

Tables 2.1 – 2.4 show this comparison. There were no significant differences at the 5% level found on any of these analyses.

**Table 2.1: School type**

|                          |   | main sample  | total participants |
|--------------------------|---|--------------|--------------------|
| Independent              | n | 13           | 11                 |
|                          | % | 6.8%         | 6.7%               |
| Maintained non-selective | n | 168          | 147                |
|                          | % | 88.4%        | 89.1%              |
| Maintained selective     | n | 9            | 7                  |
|                          | % | 4.7%         | 4.2%               |
| Total                    |   | 190          | 165                |
|                          |   | <b>Value</b> | <b>df</b>          |
| Pearson Chi-Square       |   | 0.056        | 2                  |
|                          |   |              | <b>sig</b>         |
|                          |   |              | 0.972              |

**Table 2.2: Region**

|                    |   | main sample  | total participants |
|--------------------|---|--------------|--------------------|
| Greater London     | n | 24           | 21                 |
|                    | % | 12.6%        | 12.7%              |
| Midlands           | n | 61           | 54                 |
|                    | % | 32.1%        | 32.7%              |
| North              | n | 57           | 46                 |
|                    | % | 30.0%        | 27.9%              |
| South              | n | 48           | 44                 |
|                    | % | 25.3%        | 26.7%              |
| Total              |   | 190          | 165                |
|                    |   | <b>Value</b> | <b>df</b>          |
| Pearson Chi-Square |   | 0.215        | 3                  |
|                    |   |              | <b>sig</b>         |
| Pearson Chi-Square |   |              | 0.975              |

**Table 2.3: School attainment (GCSE band)**

|                    |   | main sample  | total participants |
|--------------------|---|--------------|--------------------|
| Lowest band        | n | 34           | 28                 |
|                    | % | 17.9%        | 17.0%              |
| 2nd lowest band    | n | 38           | 31                 |
|                    | % | 20.0%        | 18.8%              |
| Middle band        | n | 39           | 36                 |
|                    | % | 20.5%        | 21.8%              |
| 2nd highest band   | n | 39           | 37                 |
|                    | % | 20.5%        | 22.4%              |
| Highest band       | n | 40           | 33                 |
|                    | % | 21.1%        | 20.0%              |
| Total              |   | 190          | 165                |
|                    |   | <b>Value</b> | <b>df</b>          |
| Pearson Chi-Square |   | 0.376        | 4                  |
|                    |   |              | <b>sig</b>         |
| Pearson Chi-Square |   |              | 0.984              |

**Table 2.4: Gender**

|                    |   | <b>main sample</b> | <b>total participants</b> |            |
|--------------------|---|--------------------|---------------------------|------------|
| Boys               | n | 8                  | 8                         |            |
|                    | % | 4.2%               | 4.8%                      |            |
| Girls              | n | 17                 | 14                        |            |
|                    | % | 8.9%               | 8.5%                      |            |
| Mixed              | n | 165                | 143                       |            |
|                    | % | 86.8%              | 86.7%                     |            |
| Total              |   | 190                | 165                       |            |
|                    |   | <b>Value</b>       | <b>df</b>                 | <b>sig</b> |
| Pearson Chi-Square |   | 0.102              | 2                         | 0.950      |

## 2.2 Logistic regression

The second stage was to conduct a logistic regression analysis. Included in this were the stratification variables plus additional variables which are generally considered to be connected with school attainment. These additional variables were:

- Number of full-time equivalent teachers in the school
- Pupil-teacher ratio
- Percentage of pupils eligible for free school meals (considered an indication of socio-economic status)
- Percentage of pupils with English as an additional language
- Average points score for General Certificate of Secondary Education
- Rural/urban school

The results of this analysis are shown in Table 2.5. Again no significant differences were found.

**Table 2.5 Results of logistic regression**

|                                          | <b>B</b> | <b>S.E.</b> | <b>df</b> | <b>Sig.</b> |
|------------------------------------------|----------|-------------|-----------|-------------|
| Full time equivalent teachers            | -0.004   | 0.006       | 1         | 0.441       |
| Pupil-teacher ratio                      | -0.051   | 0.056       | 1         | 0.356       |
| % free school meals                      | -0.009   | 0.015       | 1         | 0.554       |
| % with special educational needs         | 0.039    | 0.085       | 1         | 0.647       |
| % with English as an additional language | 0.007    | 0.010       | 1         | 0.490       |
| average GCSE total points score          | 0.004    | 0.005       | 1         | 0.417       |
| Non-selective school                     | 0.208    | 0.650       | 1         | 0.749       |
| Selective school                         | -0.442   | 0.746       | 1         | 0.554       |
| Greater London                           | -0.181   | 0.424       | 1         | 0.670       |
| North                                    | -0.041   | 0.302       | 1         | 0.891       |
| South                                    | 0.095    | 0.290       | 1         | 0.742       |
| Girl's school                            | 0.218    | 0.600       | 1         | 0.716       |
| Boy's school                             | -0.025   | 0.461       | 1         | 0.957       |
| Rural                                    | -0.117   | 0.702       | 1         | 0.867       |
| School attainment - Lowest band          | 0.640    | 0.997       | 1         | 0.521       |
| School attainment - 2nd Lowest band      | 0.502    | 0.757       | 1         | 0.507       |
| School attainment - Middle band          | 0.402    | 0.616       | 1         | 0.514       |
| School attainment - 2nd Highest band     | 0.322    | 0.491       | 1         | 0.512       |
| Constant                                 | -1.047   | 2.779       | 1         | 0.706       |

### **3 Conclusion**

Few significant differences were found between participating and non-participating main sample schools. Furthermore none of these analyses have shown significant differences between the final participating schools after replacement and the main sample. We therefore feel confident that there is no evidence of bias at school level in the 2009 PISA sample in England. Indeed there is strong evidence that the participating sample after replacement is representative of the main sample schools selected.
